# Supplementary material for: Cu(i) and Zn(ii) complexes of 7-azaindole-containing scorpionates: Structures, luminescence and fluxionality
Source: Royal Society of Chemistry journal article supplement (doi:10.1039/b414328k), 2004-12-21

**Supporting information**

**Cu(I) and Zn(II) Complexes of 7-Azaindole-Containing Scorpionates:  
Structures, Luminescence and Fluxionality**

Datong Song,<sup>†</sup> Wen Li Jia, Gang Wu, Suning Wang\*

Department of Chemistry, Queen's University, Kingston, Ontario, K7L 3N6, Canada

Figure 1. The plot of  $\ln(k)$  versus  $1/T$  for **3**.

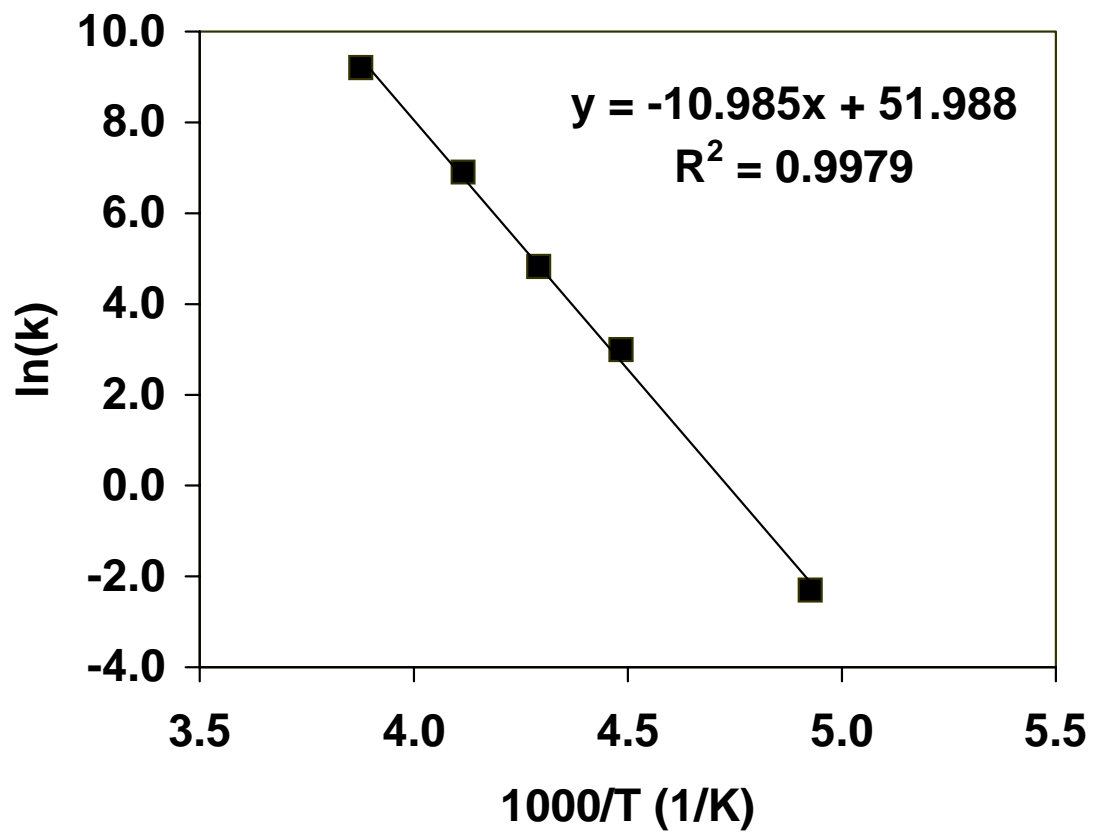

The complete drawing of **3**

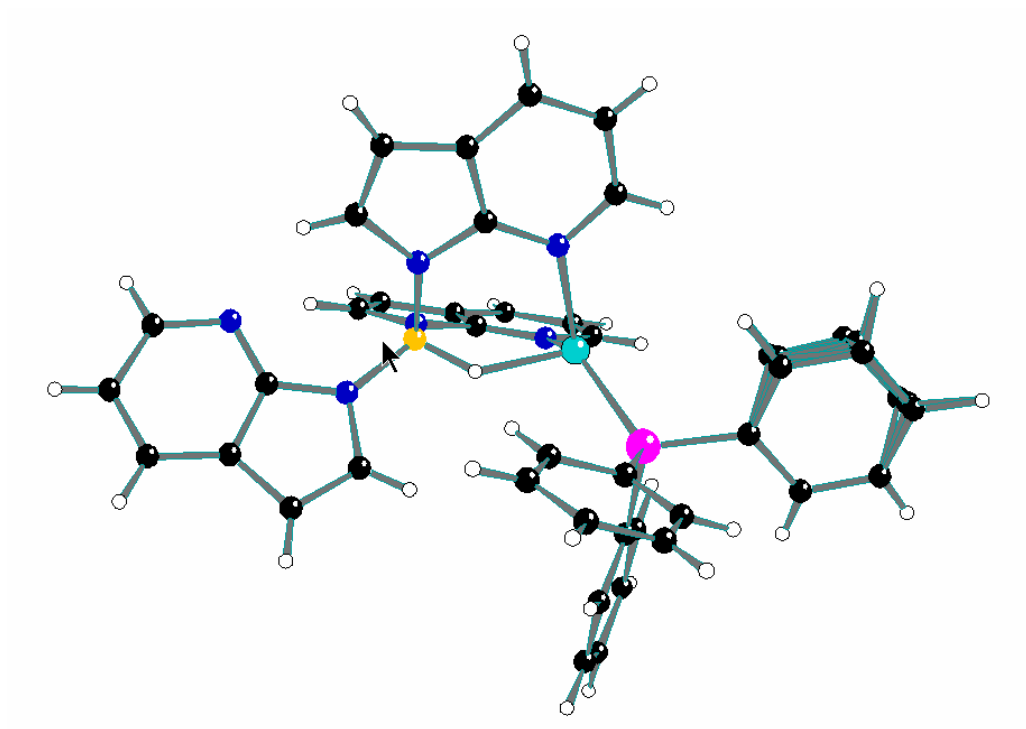

Supplement: b414328k.pdf [file b414328k.pdf]
